# Supplementary material for: Atrophy associated with tau pathology precedes overt cell death in a mouse model of progressive tauopathy
Source: PubMed Central journal article supplement — Sci Adv. 2020 Oct 16;6(42):eabc8098. doi: 10.1126/sciadv.abc8098 (PMC7567584; doi:10.1126/sciadv.abc8098), 2020-10-16
Supplement: abc8098_SM.pdf [file abc8098_SM.pdf]

## Supplementary Materials for

### **Atrophy associated with tau pathology precedes overt cell death in a mouse model of progressive tauopathy**

Christine W. Fung, Jia Guo, Hongjun Fu, Helen Y. Figueroa, Elisa E. Konofagou, Karen E. Duff\*

\*Corresponding author. Email: [k.duff@ucl.ac.uk](mailto:k.duff@ucl.ac.uk)

Published 16 October 2020, *Sci. Adv.* **6**, eabc8098 (2020)  
DOI: 10.1126/sciadv.abc8098

#### **This PDF file includes:**

Fig. S1

## Supplementary Materials

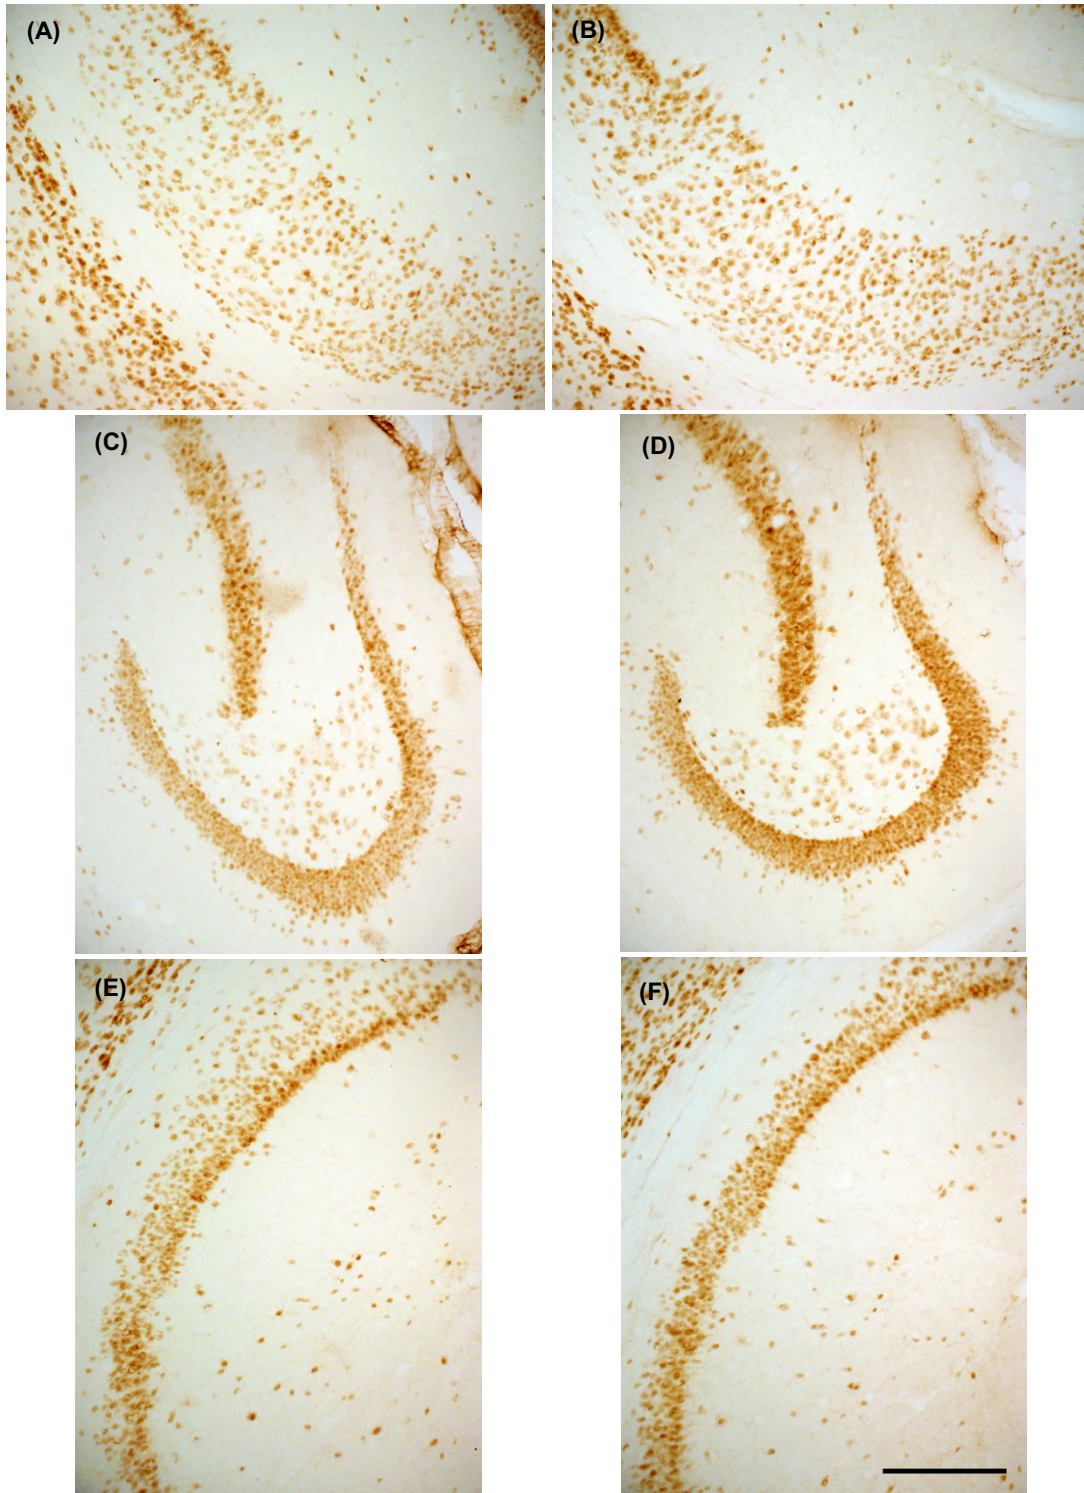

**Figure S1:** Mouse sections in the medial temporal lobe (MTL) stained with anti-NeuN antibody. NeuN<sup>+</sup> neurons are indicated with brown staining. Number of NeuN<sup>+</sup> neurons were counted in the MTL at the moderate stage (30-36 months old). Representative NeuN<sup>+</sup> stained slice in the

Sub of **(A)** an EC-Tau mouse, and **(B)** a control mouse, DG of **(C)** an EC-Tau mouse, and **(D)** a control mouse, and CA1 of **(E)** an EC-Tau mouse, and **(F)** a control mouse. Scale bar, 200  $\mu\text{m}$ . Subiculum (Sub), dentate gyrus (DG), cornu ammonis (CA1).
